# Supplementary material for: Dissociative photoionization of acetaldehyde in the 10.2–19.5 eV VUV range
Source: Royal Society of Chemistry journal article supplement (doi:10.1039/d4cp01984a), 2024-01-01
Supplement: d4cp01984a1.pdf [file d4cp01984a1.pdf]

## Electronic Supplementary Information

### Dissociative photoionization of acetaldehyde in the 10 -19.5 eV VUV range

Pedro Recio,<sup>a</sup> Roger Y. Bello,<sup>b</sup> Gustavo A. García,<sup>c</sup> Alexandre Zanchet,<sup>d</sup> Jesús  
González-Vázquez,<sup>e,f</sup> Luis Bañares,<sup>a,g</sup> and Sonia Marggi Poullain<sup>a,\*</sup>

<sup>a</sup> Departamento de Química Física, Facultad de Ciencias Químicas, Universidad Complutense de Madrid, 28040 Madrid, Spain. E-mail: [smarggi@ucm.es](mailto:smarggi@ucm.es)

<sup>b</sup> Departamento de Química Física Aplicada, Facultad de Ciencias, Universidad Autónoma de Madrid, 28049 Madrid, Spain

<sup>c</sup> Synchrotron SOLEIL, L'Orme des Merisiers, St. Aubin, BP 48, 91192 Gif-sur-Yvette, France

<sup>d</sup> Instituto de Física Fundamental, Consejo Superior de Investigaciones Científicas, C/ Serrano, 123, 28006 Madrid, Spain

<sup>e</sup> Departamento de Química, Facultad de Ciencias, Universidad Autónoma de Madrid, 28049 Madrid, Spain

<sup>f</sup> Institute for Advanced Research in Chemical Sciences (IAdChem), Universidad Autónoma de Madrid, 28049 Madrid, Spain

<sup>g</sup> Instituto Madrileño de Estudios Avanzados en Nanociencia (IMDEA-Nanoscience), Cantoblanco, 28049 Madrid, Spain

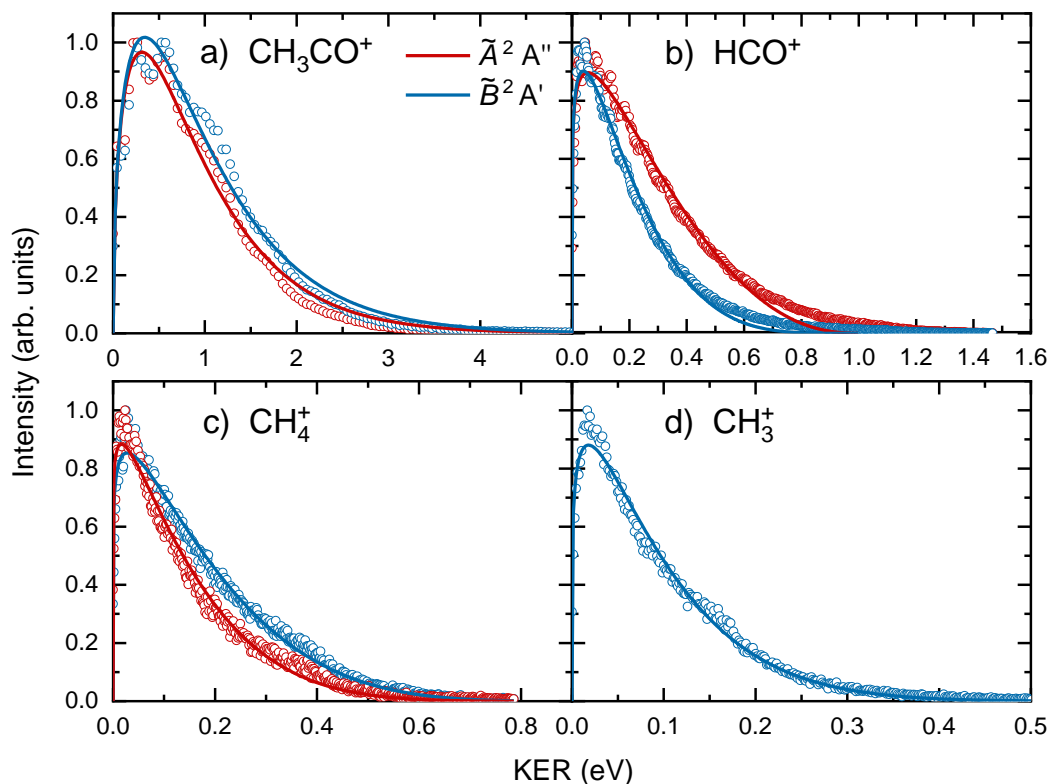

**Figure S1:** Experimental kinetic energy release (KER) following photoionization at 15 eV for each fragment, obtained by integration of the KECD, depicted in Fig. 3 of the manuscript, over photoelectron energies between 1.3 and 2.2 eV and between 0.5 and 1.3 eV, corresponding to photoionization into the  $\tilde{A}$  ( $^2A''$ ) and the  $\tilde{B}$  ( $^2A'$ ) cationic states, respectively (Panels a-c). All photoelectron energies are taken to obtain the KER for the methyl cation (Panel d) and it is associated to photoionization into highly-vibrationally excited states of the  $\tilde{B}$  ( $^2A'$ ) state as well as some minor threshold photoionization into  $\tilde{C}$  ( $^2A'$ ) state.

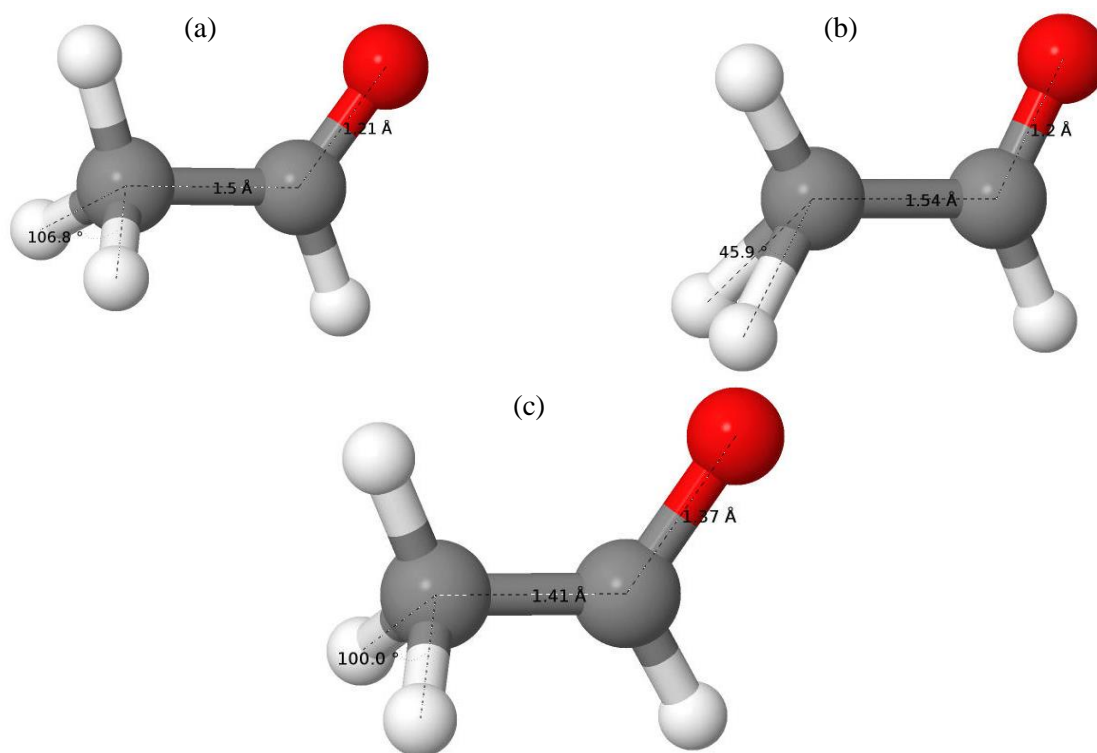

**Figure S2:** Computed geometry (a) at the equilibrium (*i.e.* vertical photoionization at Franck-Condon) (b) at the conical intersection found between the  $\tilde{A}$  ( ${}^2A''$ ) and the  $\tilde{X}$  ( ${}^2A'$ ) ionic states and (c) at the energy minimum of the state. Relevant distances and angles are shown.

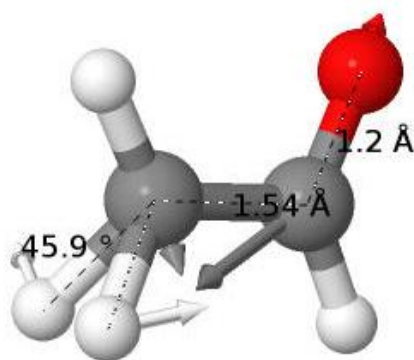

**Figure S3:** Computed geometry at the at the conical intersection found between the  $\tilde{A}$  ( ${}^2A''$ ) and the  $\tilde{X}$  ( ${}^2A'$ ) ionic states (as in Fig. S2). The arrows represent the non-adiabatic vector characterizing the conical intersection.

## Geometries for relevant points:

### Equilibrium geometry (FC)

|   |             |             |             |
|---|-------------|-------------|-------------|
| O | 0.00130272  | 0.05880247  | -1.09163746 |
| C | 0.00018129  | -0.46168660 | 0.00601302  |
| C | 0.00002435  | 0.29252579  | 1.30028092  |
| H | -0.00169774 | -1.56264857 | 0.09542013  |
| H | -0.00085212 | 1.36309287  | 1.12077939  |
| H | -0.87466897 | 0.00702178  | 1.88533814  |
| H | 0.87571045  | 0.00873529  | 1.88471542  |

7

### Minimum energy for $\tilde{X}$ ( ${}^2A'$ ) state

|   |             |             |             |
|---|-------------|-------------|-------------|
| O | 0.00049251  | 0.04763632  | -1.06412626 |
| C | 0.00072201  | -0.46340391 | 0.02459259  |
| C | 0.00015459  | 0.32244036  | 1.32610542  |
| H | -0.00146800 | -1.57768914 | 0.06267646  |
| H | -0.00057487 | 1.38675627  | 1.12149812  |
| H | -0.89062556 | -0.00565737 | 1.86493950  |
| H | 0.89129932  | -0.00423950 | 1.86522398  |

7

### Minimum energy for $\tilde{A}$ ( ${}^2A''$ ) state

|   |             |             |             |
|---|-------------|-------------|-------------|
| O | 0.00066990  | 0.09011031  | -1.15019264 |
| C | -0.00007852 | -0.46255724 | 0.09837356  |
| C | -0.00020799 | 0.32620755  | 1.26636007  |
| H | -0.00031794 | -1.55550279 | 0.12904526  |
| H | -0.00043598 | 1.39752452  | 1.11072390  |
| H | -0.84825419 | -0.04491137 | 1.87378360  |
| H | 0.84862471  | -0.04502797 | 1.87281603  |

7

Conical intersection found between  $\tilde{A}$  ( ${}^2A''$ ) and  $\tilde{X}$  ( ${}^2A'$ )

|   |             |             |             |
|---|-------------|-------------|-------------|
| O | -0.06268321 | -0.00184413 | -1.17538521 |
| C | -0.00060820 | -0.56465536 | -0.12095768 |
| C | 0.01474324  | 0.38656067  | 1.09327174  |
| H | 0.03823353  | -1.64346454 | 0.06582331  |
| H | 0.04289013  | 1.46958496  | 1.01282124  |
| H | -0.49284035 | 0.00948340  | 2.13981293  |
| H | 0.46026486  | 0.05017803  | 2.18552345  |

7

Dissociation limit:  $\text{CH}_3 + \text{HCO}^+$

|   |             |              |              |
|---|-------------|--------------|--------------|
| O | -0.00002009 | -10.50752494 | -17.22221187 |
| C | -0.00000712 | -11.39623957 | -16.54750911 |
| C | 0.00000323  | 0.17211526   | 1.20898424   |
| H | 0.00001615  | -12.26988963 | -15.88605577 |
| H | 0.00004153  | 1.08448687   | 0.63133820   |
| H | -0.93515992 | -0.27564077  | 1.51077536   |
| H | 0.93512622  | -0.27566451  | 1.51086466   |

7

Dissociation limit:  $\text{CH}_3^+ + \text{HCO}$

|   |             |              |              |
|---|-------------|--------------|--------------|
| O | -0.30208331 | -10.69166445 | -15.76069793 |
| C | 0.30025140  | -11.52341474 | -16.35368151 |
| C | -0.02553478 | 0.18864938   | 1.17588273   |
| H | -0.02639314 | -11.93889819 | -17.34469662 |
| H | -0.04156438 | 1.12176065   | 0.61950794   |
| H | -0.95734452 | -0.26367584  | 1.50424019   |
| H | 0.92199808  | -0.29124654  | 1.40501877   |

7

Dissociation limit: CH<sub>4</sub><sup>+</sup> + CO

|   |             |              |              |
|---|-------------|--------------|--------------|
| O | 0.45304599  | -10.59526339 | -17.86314220 |
| C | -0.47050297 | -10.31827246 | -17.28416741 |
| C | 0.00501510  | 0.27396913   | 1.27889968   |
| H | 0.16742307  | -0.19122969  | 0.30640819   |
| H | 0.93799304  | 0.69377809   | 1.64358954   |
| H | -0.73253305 | 1.06593048   | 1.18518446   |
| H | -0.35502738 | -0.46951169  | 1.98429072   |

7

Dissociation limit: CH<sub>3</sub>CO<sup>+</sup> + H

|   |             |             |             |
|---|-------------|-------------|-------------|
| O | 0.00005390  | 0.17358825  | -1.22091564 |
| C | 0.00002938  | 0.24774840  | -0.10254903 |
| C | -0.00000136 | 0.39053625  | 1.33019959  |
| H | -0.00005697 | -2.37932375 | 0.21241902  |
| H | 0.00001271  | 1.45929149  | 1.55275238  |
| H | -0.89937832 | -0.09298273 | 1.71448098  |
| H | 0.89934065  | -0.09301489 | 1.71452250  |
